# Supplementary material for: Mechanically conditioned cell sheets cultured on thermo-responsive surfaces promote bone regeneration
Source: PubMed Central journal article supplement — Biomater Transl. 2023 Mar 28;4(1):27–40. doi: 10.12336/biomatertransl.2023.01.005 (PMC10189809; doi:10.12336/biomatertransl.2023.01.005), 2023-03-28
Supplement: bt-04-01-27-s001.pdf [file bt-04-01-27-s001.pdf]

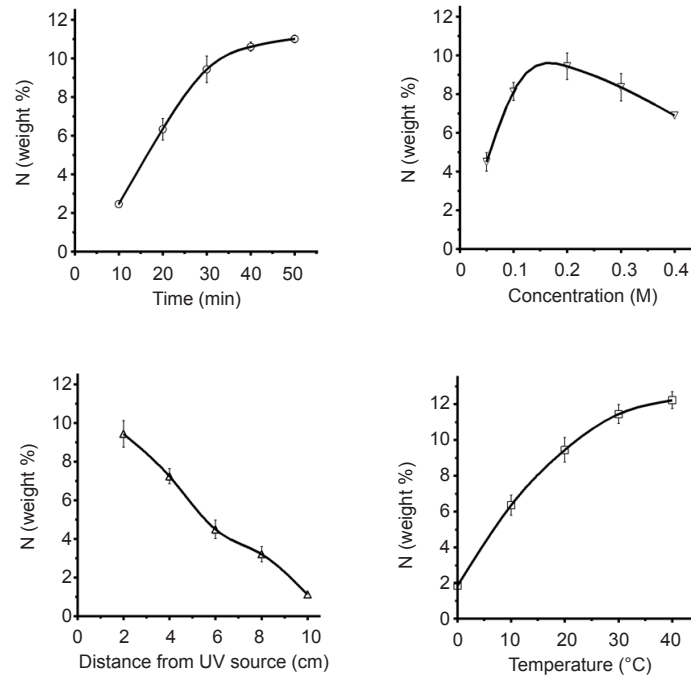

**Additional Figure 1.** Effect of NIPAAm monomer concentration, polymerization temperature, polymerization time and distance from UV source on grafting yield of PDMS-g-PNIPAAm surface. Weight ratio of nitrogen atoms signify PNIPAAm grafting yield. NIPAAm: poly(N-isopropyl acrylamide); UV: ultraviolet.

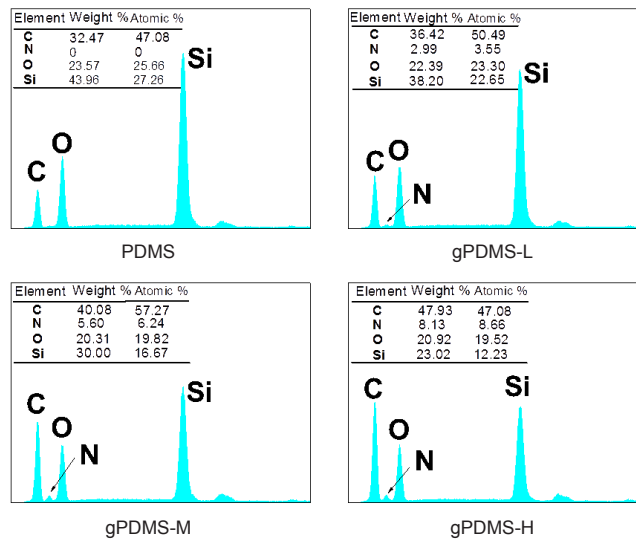

**Additional Figure 2.** Energy dispersion spectrum of PDMS, gPDMS-L, gPDMS-M and gPDMS-H substrates. gPDMS-L, gPDMS-M and gPDMS-H indicate PDMS-g-PNIPAAm substrate with low, medium and high grafting yield, respectively. PDMS: poly(dimethylsiloxane).

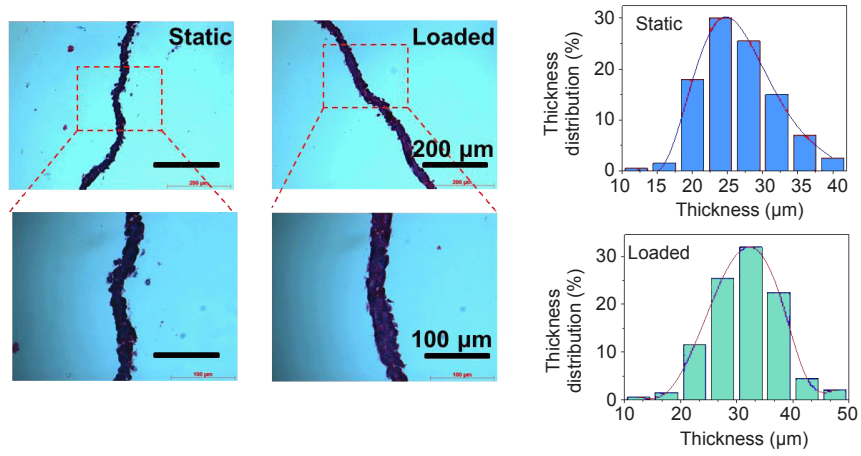

**Additional Figure 3.** Masson staining of cell sheet cross-sections and thickness distribution of cell sheet obtained under static or loaded conditions. Scale bars: 200 μm (upper), 100 μm (lower).
